# Supplementary material
Source: PubMed Central journal article supplement (PMC1472505)

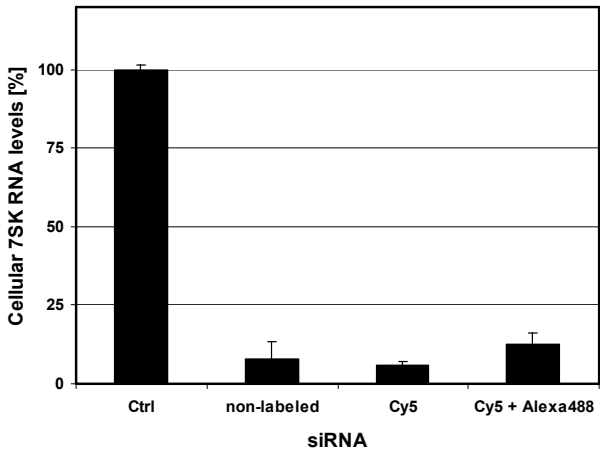

Supplement: pnas_0600148103_1.pdf [file pnas_0600148103_1.pdf]

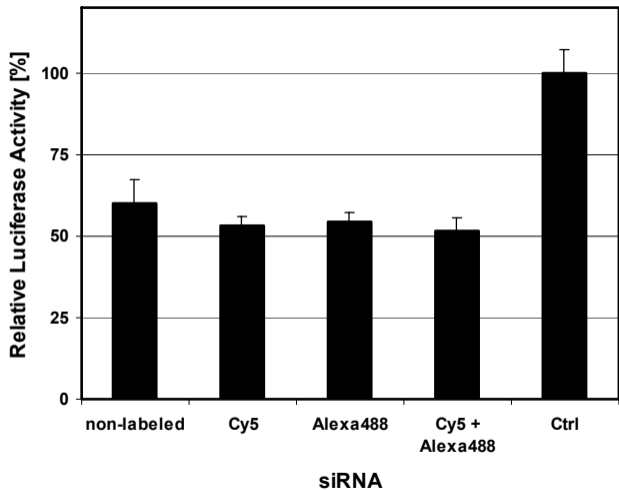

Supplement: pnas_0600148103_2.pdf [file pnas_0600148103_2.pdf]
